# Supplementary material for: Systematic analysis of dynamic miRNA-target interactions during C. elegans development
Source: Oxford University Press journal article supplement (doi:10.1242/dev.039008), 2009-08-12

**A**

| miRNA family/mRNA | Correlation P value |
|-------------------|---------------------|
| lin-4/lin-14a     | 0.000423            |
| let-7/hbl-1       | 0.000481            |
| let-7/pha-4       | 0.00416             |
| let-7/T14B1.1     | 0.0272              |
| let-7/daf-12      | 0.0478 *            |
| lin-4/lin-28a     | -0.847              |
| let-7/let-60      | -0.493              |
| let-7/lss-4       | 0.53                |
| let-7/die-1       | -0.196              |

**B**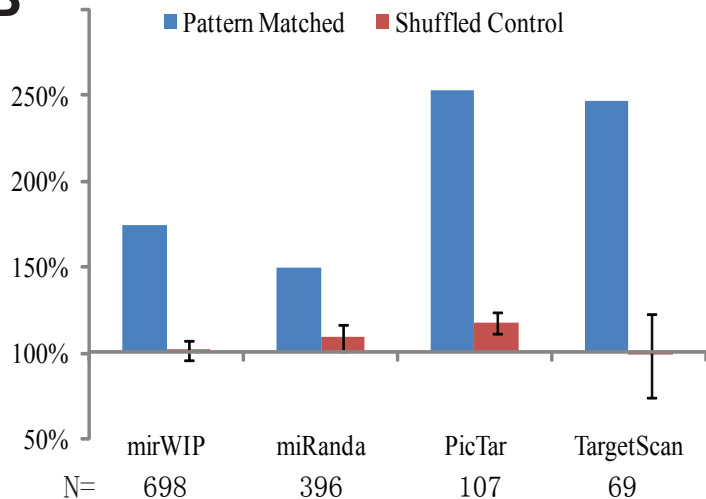

Supplement: dev039008figs3.pdf [file dev039008figs3.pdf]
