# Supplementary material for: Systematic analysis of dynamic miRNA-target interactions during C. elegans development
Source: Oxford University Press journal article supplement (doi:10.1242/dev.039008), 2009-08-12
Supplement: dev039008tables1.pdf [file dev039008tables1.pdf]

| miRNA          | Family        | Seed   | Cluster | Chromosome | Start    | End      | Strand |
|----------------|---------------|--------|---------|------------|----------|----------|--------|
| <i>lin-4</i>   | <i>lin-4</i>  | CCCUGA | 3       | II         | 5902220  | 5902313  | +      |
| <i>miR-237</i> | <i>lin-4</i>  | CCCUGA | 3       | X          | 8154027  | 8154125  | +      |
| <i>let-7</i>   | <i>let-7</i>  | GAGGUA | 3       | X          | 14744094 | 14744192 | -      |
| <i>miR-48</i>  | <i>let-7</i>  | GAGGUA | 3       | V          | 14364390 | 14364487 | -      |
| <i>miR-241</i> | <i>let-7</i>  | GAGGUA | 3       | V          | 14366166 | 14366261 | -      |
| <i>miR-35</i>  | <i>miR-35</i> | CACCGG | 2       | II         | 11537524 | 11537620 | +      |
| <i>miR-36</i>  | <i>miR-35</i> | CACCGG | 2       | II         | 11537629 | 11537725 | +      |
| <i>miR-37</i>  | <i>miR-35</i> | CACCGG | 2       | II         | 11537749 | 11537846 | +      |
| <i>miR-38</i>  | <i>miR-35</i> | CACCGG | 2       | II         | 11537846 | 11537943 | +      |
| <i>miR-39</i>  | <i>miR-35</i> | CACCGG | 2       | II         | 11538005 | 11538091 | +      |
| <i>miR-40</i>  | <i>miR-35</i> | CACCGG | 2       | II         | 11538100 | 11538191 | +      |
| <i>miR-42</i>  | <i>miR-35</i> | CACCGG | 1       | II         | 11889727 | 11889821 | +      |
| <i>miR-46</i>  | <i>miR-46</i> | GUCAUG | 3       | III        | 13660395 | 13660491 | +      |
| <i>miR-47</i>  | <i>miR-46</i> | GUCAUG | 3       | X          | 13921173 | 13921269 | +      |
| <i>miR-49</i>  | <i>miR-49</i> | AGCACC | 1       | X          | 9989216  | 9989312  | +      |
| <i>miR-83</i>  | <i>miR-49</i> | AGCACC | 3       | IV         | 7841614  | 7841711  | +      |
| <i>miR-50</i>  | <i>miR-50</i> | GAUAUG | 1       | I          | 1738636  | 1738734  | +      |
| <i>miR-90</i>  | <i>miR-50</i> | GAUAUG | 1       | III        | 8873894  | 8873991  | -      |
| <i>miR-51</i>  | <i>miR-51</i> | ACCCGU | 1       | IV         | 11025983 | 11026082 | -      |
| <i>miR-52</i>  | <i>miR-51</i> | ACCCGU | 1       | IV         | 14033976 | 14034075 | +      |
| <i>miR-53</i>  | <i>miR-51</i> | ACCCGU | 1       | IV         | 11027563 | 11027661 | -      |
| <i>miR-54</i>  | <i>miR-51</i> | ACCCGU | 1       | X          | 13144917 | 13145015 | -      |
| <i>miR-55</i>  | <i>miR-51</i> | ACCCGU | 1       | X          | 13144748 | 13144845 | -      |
| <i>miR-56</i>  | <i>miR-51</i> | ACCCGU | 1       | X          | 13144612 | 13144708 | -      |
| <i>miR-57</i>  | <i>miR-57</i> | ACCCUG | 1       | II         | 7850429  | 7850527  | -      |
| <i>miR-58</i>  | <i>miR-58</i> | GAGAUC | 3       | IV         | 3233250  | 3233346  | +      |
| <i>miR-80</i>  | <i>miR-58</i> | GAGAUC | 3       | III        | 8865177  | 8865274  | -      |
| <i>miR-81</i>  | <i>miR-58</i> | GAGAUC | 3       | X          | 2431067  | 2431174  | +      |
| <i>miR-82</i>  | <i>miR-58</i> | GAGAUC | 3       | X          | 2435253  | 2435349  | -      |
| <i>miR-63</i>  | <i>miR-63</i> | AUGACA | 3       | X          | 17598678 | 17598781 | -      |
| <i>miR-64</i>  | <i>miR-63</i> | AUGACA | 1       | III        | 2172836  | 2172945  | +      |
| <i>miR-65</i>  | <i>miR-63</i> | AUGACA | 1       | III        | 2172990  | 2173089  | +      |
| <i>miR-66</i>  | <i>miR-63</i> | AUGACA | 1       | III        | 2173096  | 2173194  | +      |
| <i>miR-73</i>  | <i>miR-72</i> | GGCAAG | 1       | X          | 2368759  | 2368857  | +      |
| <i>miR-74</i>  | <i>miR-72</i> | GGCAAG | 2       | X          | 2369037  | 2369133  | +      |

**Table S1. miRNAs with parallel AIN-2-association patterns tend to share the same seed sequence.** The table lists all the miRNAs that were detected in the AIN-2 IP and also share the same 6nt seed sequence with at least one other miRNA detected in the AIN-2 IP. Cluster indicates the cluster group of the miRNA in Figure 1A, which represents the temporal miRISC-association pattern of the miRNA during development. The residing chromosome number, the genomic start/end position and the coding DNA strand of each miRNA gene are also listed.
