# Supplementary figures and images for: Systematic analysis of dynamic miRNA-target interactions during C. elegans development
Source: Oxford University Press journal article supplement (doi:10.1242/dev.039008), 2009-08-12

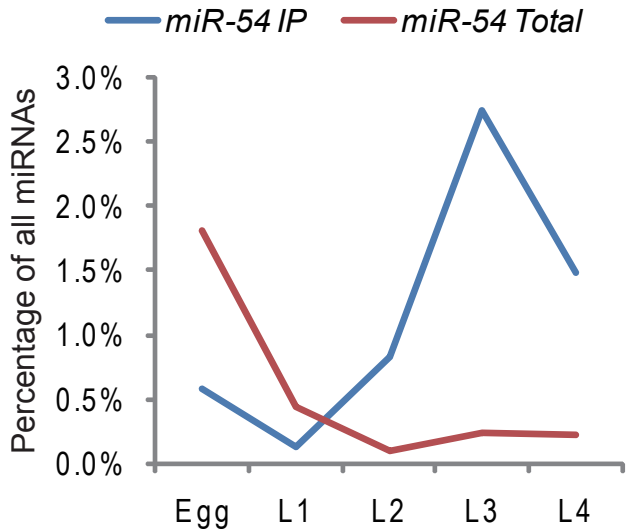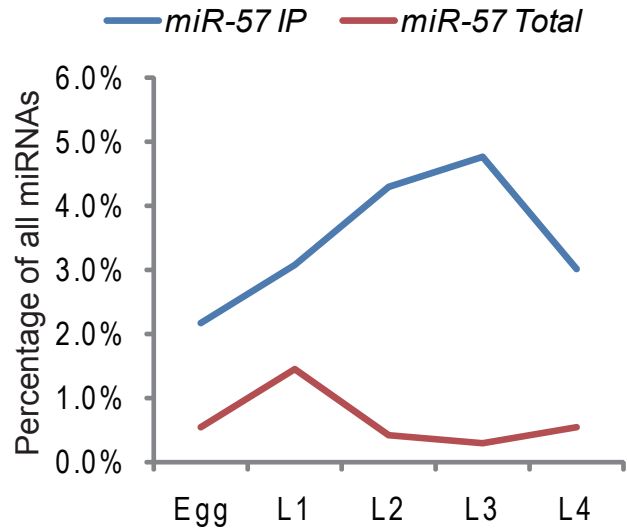

Supplement: dev039008figs1.pdf [file dev039008figs1.pdf]

**A**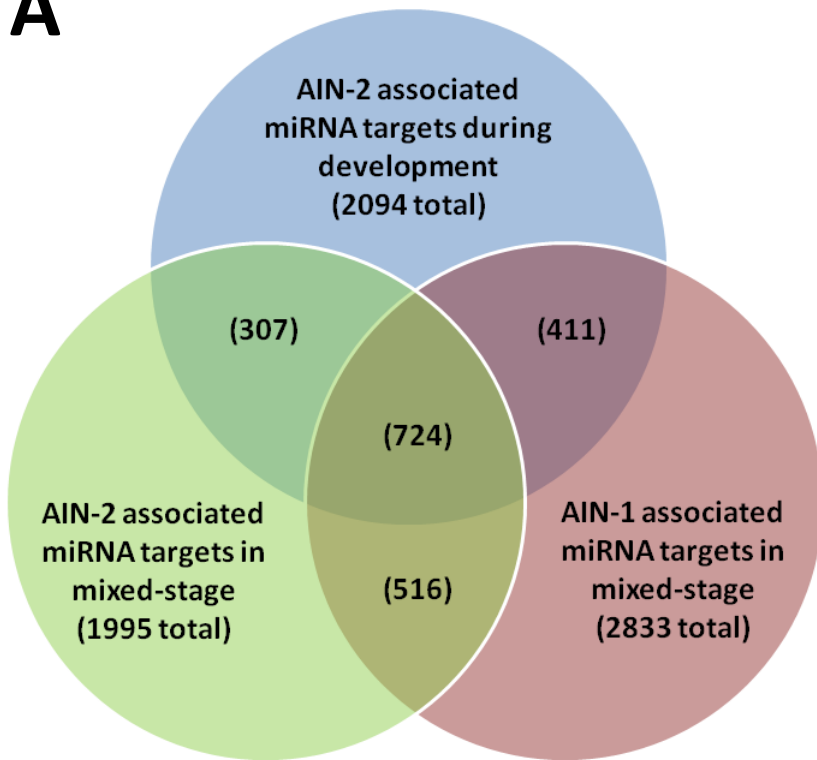**B**

**Percentage of overlap with this study**

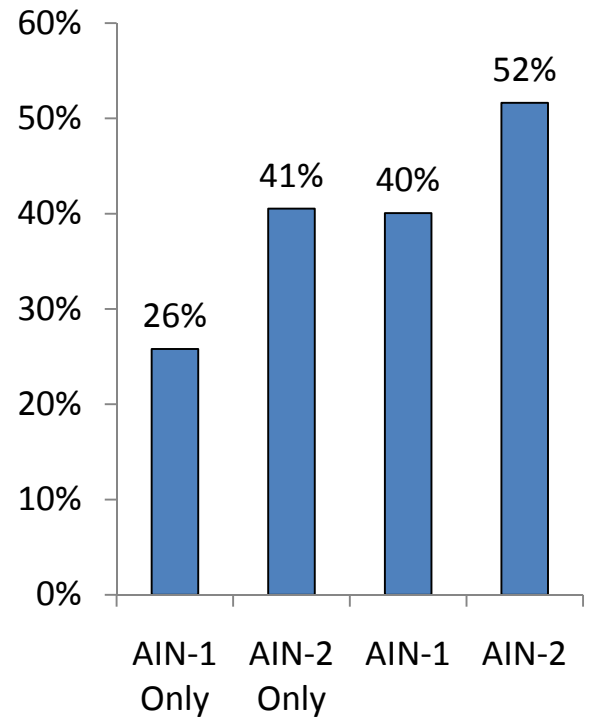**C**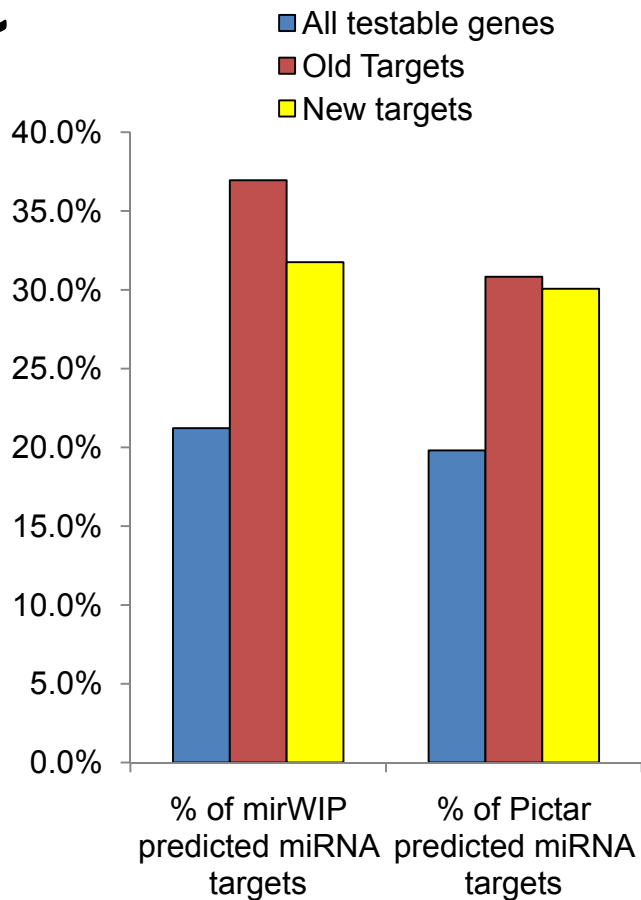**D**

**Percentage of stage dependent miRNA targets**

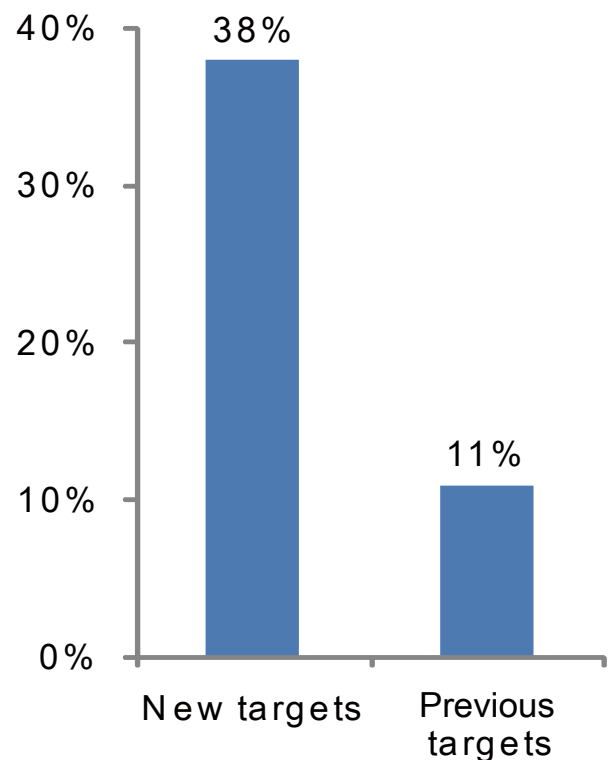

Supplement: dev039008figs2.pdf [file dev039008figs2.pdf]
